# Supplementary material
Source: PubMed Central journal article supplement (PMC4902716)
Supplement: NIHMS788537-supplement-01.pdf [file NIHMS788537-supplement-01.pdf]

**Supplement Figure 1. Structure and expression of the *ote* gene and *P[nosP:ote, w<sup>+</sup>]* transgene.**

**A. Top:** Schematic of the *ote* gene that is annotated to show the positions of coding region that contain the LEM-D (green), the middle region (black) and the peripheral localization domain (yellow). Shown on the schematic of the *ote* gene are the positions of the missense mutation (PK) and transposon insertion (B279G) in the *ote* mutants used in this study. **Bottom:** Schematic of the *P*-element transgene used to direct germ cell restricted production of Ote. This fusion gene contains the *nanos* promoter (*nosP*) and 5' UTR (- 184 to +261, red) placed upstream of the *ote* coding sequence and 3'UTR (+98 to +1,477). **B.** Confocal images of three-day-old *ote*<sup>+/+</sup>, *ote*<sup>-/-</sup>, and *ote*<sup>-/-</sup>, *P[nosP:ote, w<sup>+</sup>]* testes stained with antibodies against Ote (green) and DAPI (white). Scale bars, 20 μm.
