# Supplementary material
Source: PubMed Central journal article supplement (PMC4902716)

Supplement Figure 1. Structure and expression of the *ote* gene and  $P[nosP:ote,w^+]$  transgene.

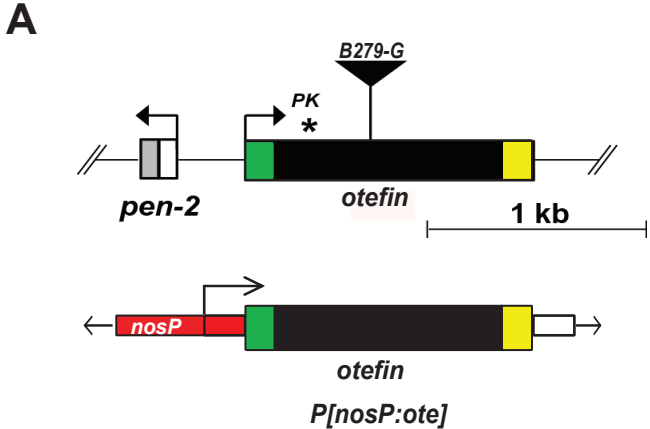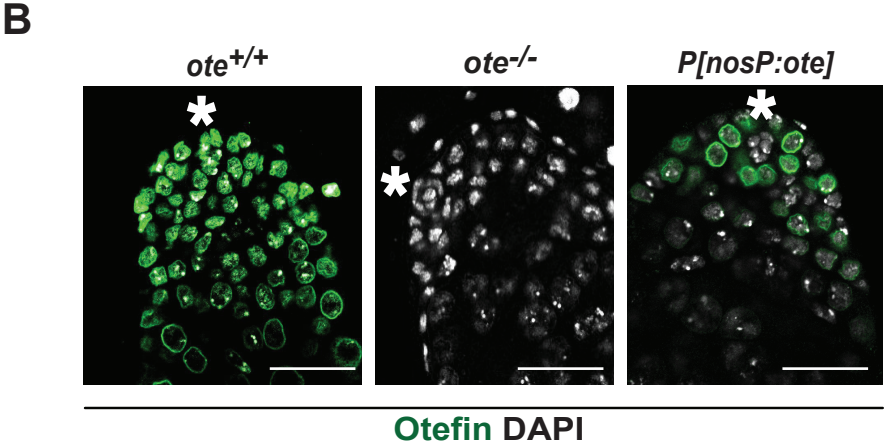

Supplement: NIHMS788537-supplement.pdf [file NIHMS788537-supplement.pdf]
